# Supplementary material
Source: PubMed Central journal article supplement (PMC6362352)
Supplement: EMBR-20-e46612-s001.pdf [file EMBR-20-e46612-s001.pdf]

## Expanded View Figures

### Figure EV1. Coding potential of LINC00941 and validation of RNA-Seq results.

- A Utilization of the GTEx Portal to access the expression of LINC00941 in various tissues. Boxplot displaying the distribution of log<sub>10</sub> transformed TPM. Mid-line represents median. Whiskers display the upper and lower extreme.
- B UCSC view showing the genomic locus of LINC00941 with two different Isoforms. Transcription start sites and poly-A sites as well as chromatin marks are included.
- C Usage of different bioinformatical algorithms to investigate the protein-coding potential of LINC00941.
- D qRT-PCR analysis for LINC00941 subcellular localization in undifferentiated keratinocytes (D0) (*n* = 3 biological replicates). Data are presented as mean ± SD.
- E qRT-PCR analysis of LINC00941 repression during keratinocyte differentiation organotypic epidermal tissue compared to undifferentiated keratinocytes (D0) (*n* = 3 biological replicates). Data are presented as mean ± SD.

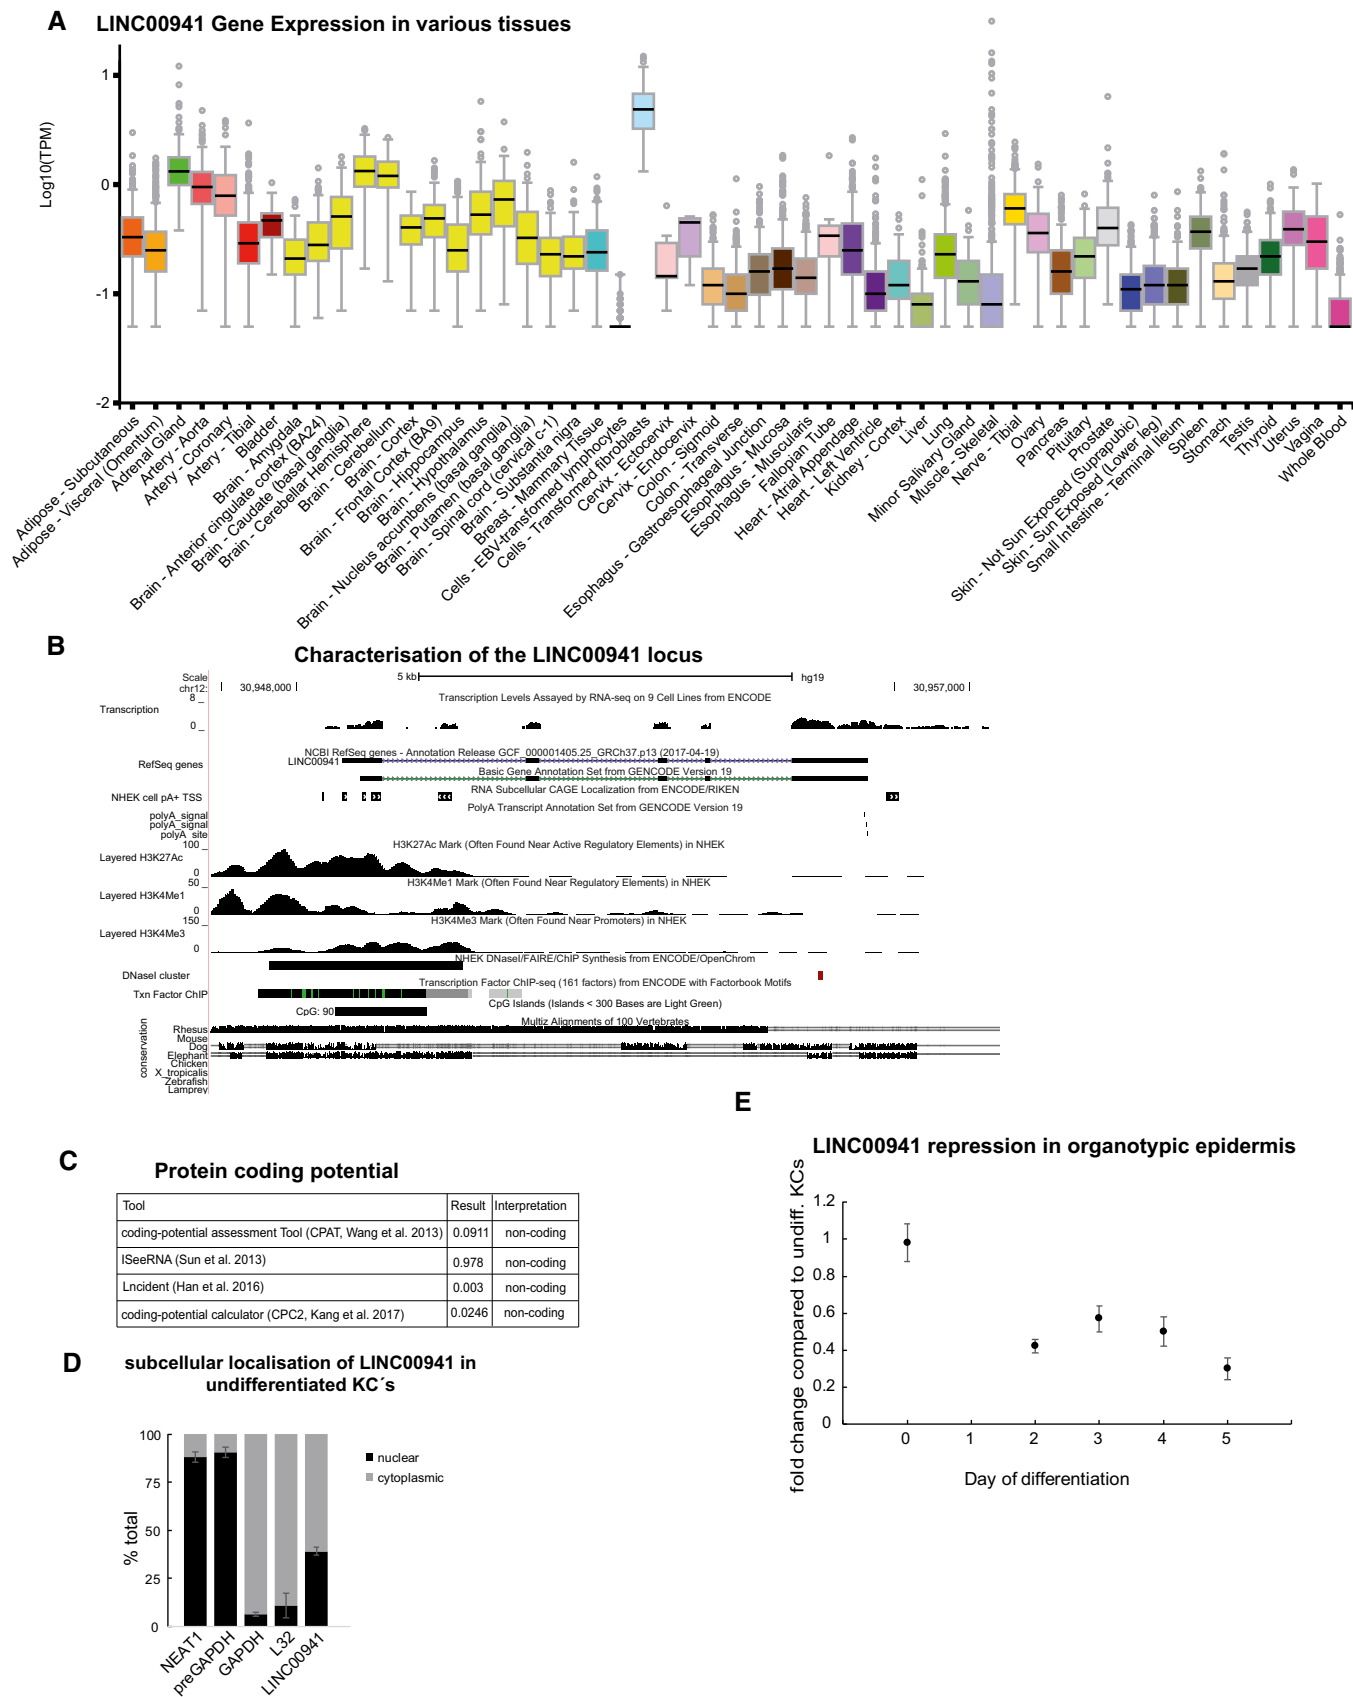

Figure EV1.

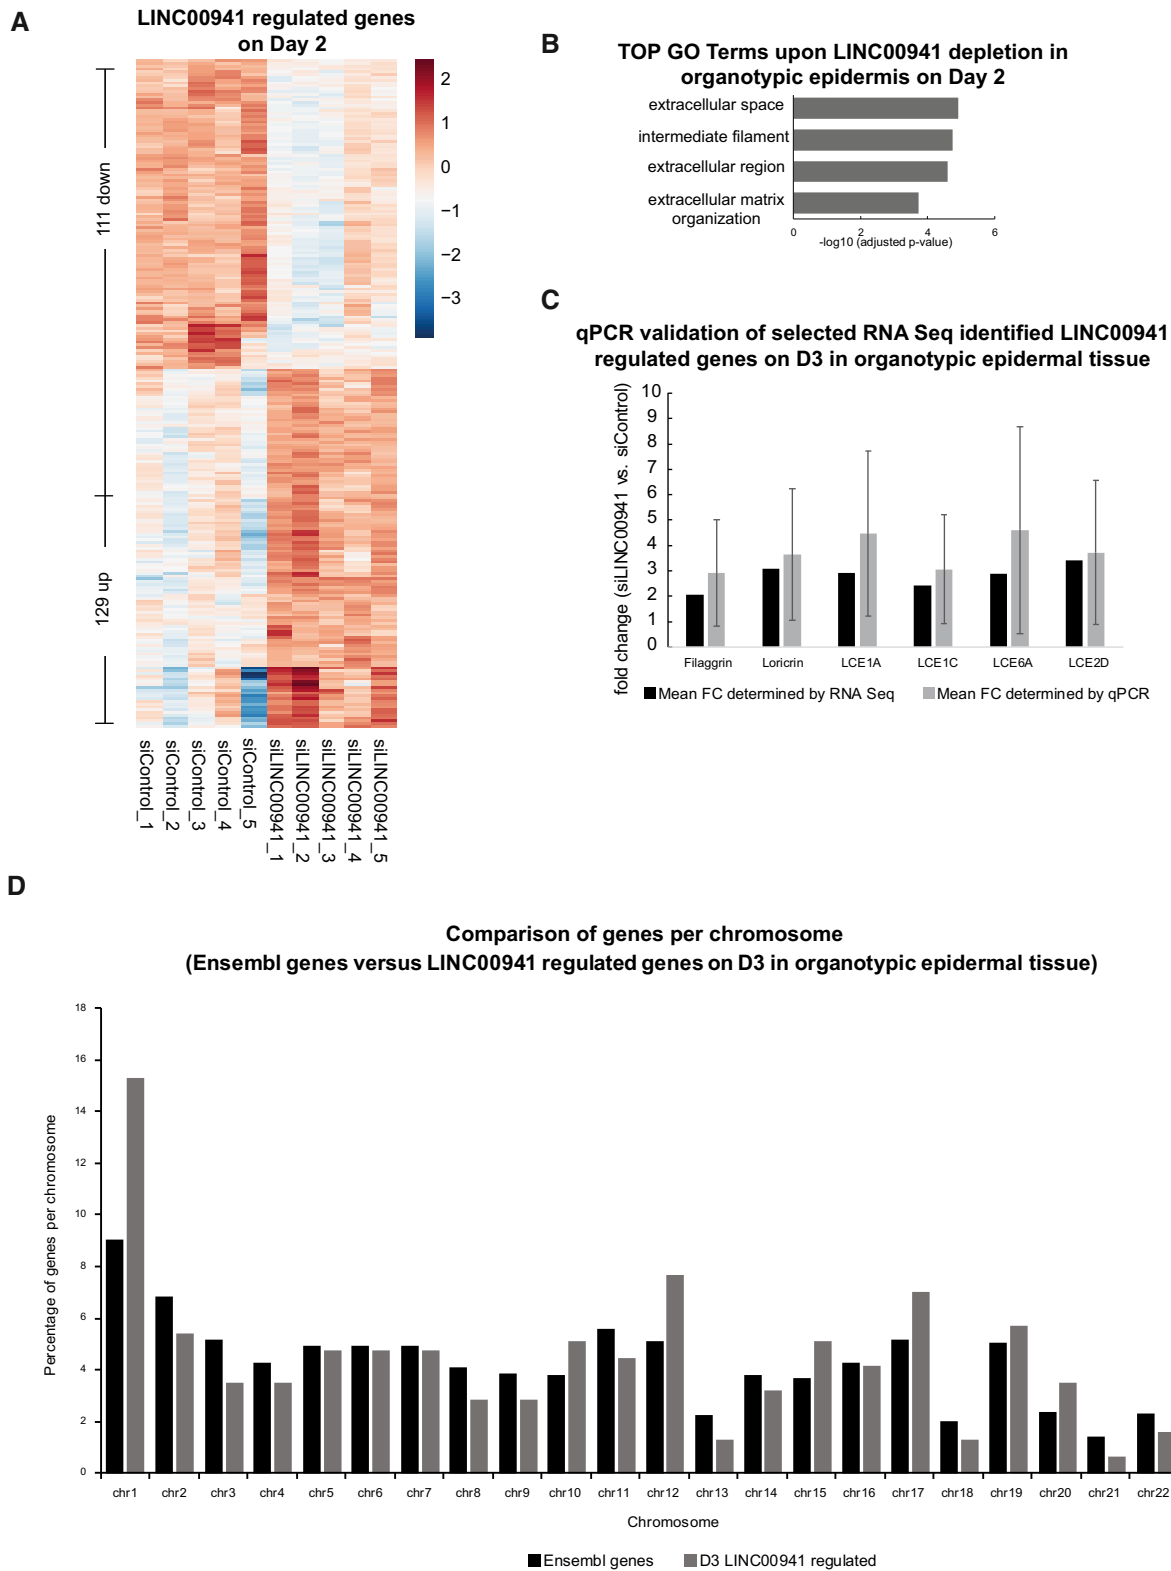

Figure EV2.

**Figure EV2. RNA-Seq validation of LINC00941 depletion.**

- A Heatmap of differentially expressed genes ( $P_{\text{adj}} < 0.05$  and  $-1 > \log_2\text{FC} > 1$ ) upon LINC00941 depletion on day 2 in organotypic epidermal tissue with marked keratinocyte differentiation genes ( $n = 5$  epidermal tissue cultures/knockdown group).
- B GO term analysis of downregulated ( $P_{\text{adj}} < 0.05$  and  $-1 > \log_2\text{FC} < 1$ ) genes in LINC00941-deficient organotypic epidermal tissue on day 2 ( $n = 5$  epidermal tissue cultures/knockdown group).
- C qRT-PCR validation of the obtained RNA-Seq results for the expression of selected genes on day 3 in LINC00941-depleted organotypic epidermal tissue ( $n = 4-5$  epidermal tissue cultures/knockdown group). Data are presented as mean  $\pm$  SD.
- D Comparison of the genomic localization of LINC00941-regulated genes ( $P_{\text{adj}} < 0.05$  and  $-1 > \log_2\text{FC} > 1$ ) on day 3 (D3) and distribution of Ensembl genes per chromosome ( $n = 4-5$  epidermal tissue cultures/knockdown group).

**Figure EV3. SPRR5 transcript characterization.**

- A Schematic overview of the genomic localization of *SPRR5*.
- B Exact genomic coordinates for the verified *SPRR5* transcript (genome release: hg38) and exemplary pictures of aligned and mapped RNA-Seq reads for control (siCtrl) and *SPRR5* knockdown (siSPRR5) with respect to *LINC01527* (lower part). The top part indicates the localization of the utilized probes for northern blot mapping as well as the results from hybridization of membranes with RNA from differentiated keratinocytes. Furthermore, the verified transcript and the Ensembl annotated version are shown and red stars indicate the RACE (rapid amplification of cDNA ends) verification of start and end points of the transcript.
- C Upstream transcription factor predictions for *SPRR5* obtained by ARCHS<sup>4</sup>.
- D UCSC view showing the genomic locus of *SPRR5* as well as the p63 ChIP-Seq peaks from studies by Kouwenhoven *et al* and Bao *et al*.
- E Knockdown of LINC00941 does not affect pan-p63 levels in human epidermal tissue ( $n = 3-4$  epidermal tissue cultures/knockdown group). Data are presented as mean  $\pm$  SD.

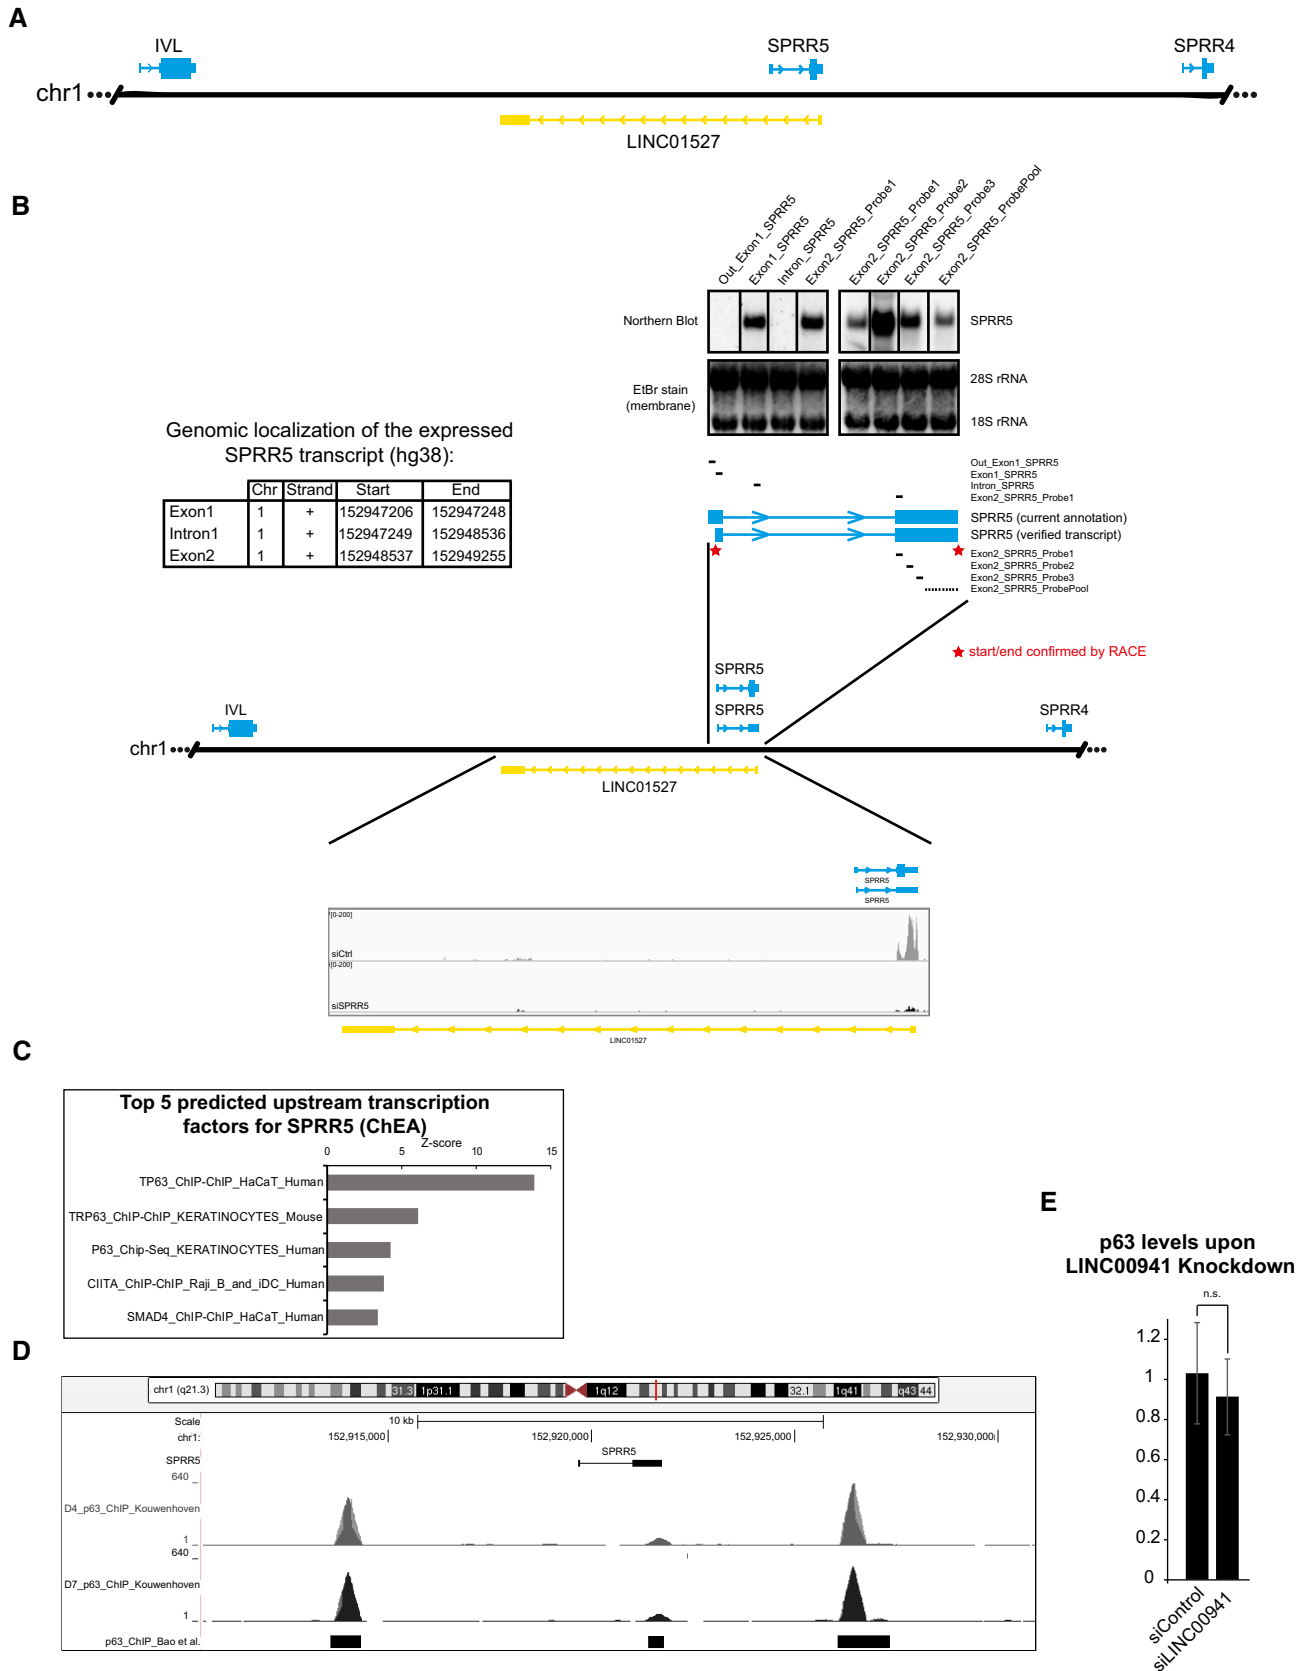

Figure EV3.

A

## Verified SPRR5 Sequence (hg38):

Exon                      Intron

5'AAACCCCTCCACACATCTGCTCCAGTCGCTGGTGAACCTTGTAAAGTCTGAAAGGTAGTACCTCTTATAG  
 CAGCCTTGCCCTTGCCTGCATCCCTAACCAACTATGGACTGGGCTGATTCTCTGGTGGTGGTCAGAAAGGATG  
 GGTCTTTTGGGGTACCTCTTTTTCCATATCATTGTGACAACTATCTTGGTCCAGCAAGTTATCCAGCAGA  
 GTAGTGTGGGAGGCTGGGCTGAGCAGGGAGAAGGAGGGGGTATCTACAAGAGGGTCAAGTATCTCAGCGAT  
 GCTGCTGGCATGGTGTGGGTGTTGCATCTTGTCAAGTGCTAAGAGGGAATTAGTAGGAGAGGAGACCCAGT  
 TCTGGGCAGAGCAACTGGAAGGACTGCTCTTCAAAGAAAAGAGAAGGCAGGAAGGAAAGAGAACAGACTC  
 CCTTGGGACAGCAGAGTTGTGGATGTCATGAGCAAAGGGCTGCAGGGACAAGACGATGTGGCACCATGG  
 AAGGCTCTGCTCTGGGAATCAGGAGACCTCTTTCCACCATCTATGCCAGTGGCTTTGAAGCCATTCTTCCC  
 TCTGAGGTTTGCTTCTCAACTGTAATTGAGAGAGGCAAGCTAGATAGTCCATTTTCATCTCTAGAGTTTT  
 CTCTTTATAAATCCTTTAGAGAGTGGTTAAGATGCGCCTTTTAAATGTTTATGAATTTACTTAACAATTACA  
 ACTCTTATATAGTTCATTTTGTGCTACTACTCTGCATGTGTGTGCGGTACATACACTACGTATGCATGC  
 ATATTTAAGTATGATTTTATATACTCATTTAATTTTGCACCAACTCTAAGAGAGGTAAGTATGAAAAACCTT  
 AGTTGCTCAAATCATATAGTTAATAAATGATTTAGCCAGAAGTCAAGTCCAGGCAATTTATCCAGATGCCA  
 CAGGTTTTGCTATAATAGGATACAACAGTCTGCTTTTCATTTCTCTTTTTTCTCTCTCCCTTTCTTT  
 TTTATGTTTTCTTTCTTTCAACCCCTCAACATTTCTGTTTTCCCTCCCTCTCTTCTCTCTTCTCTCTCT  
 CCATGTTTCTTTGTCTGAAAAGAGTTGAAATAACTTGAACACTTAAAGTTTACACATGCGCGCGCACAC  
 ACACACACACTCTCTTAAATCTGTGAAGGATCAGGGCAAGGTAAGGCAAGGCAAGGCAAGGCAAGGCAAGG  
 CAGGGGGTTCACCTGGGCTTAGGGTCTCTCTATGGCTCAAGTGTCTCTATTCTGTGTCTTTCTGTTCCAGTT  
 GCAAGTCCAGCCCAGAATGTCTCAGCAGAAGCAGAAGCAGTGTGCTCCCCGCAGCAGTGTGCCCCCACC  
 CAGCAGCGCTGCCCCCACCACAGCAGTGTGCCCCCGCTCAACAGTGTGCCCCCACCACAGCAGTGTG  
 CCCGCCCTCAACAATGTGCCCCCTCCCAGCAGTGTGCCCCCACCACAGCAGTGTGCCCCCACCCTCA  
 GCAGTACTGCCCCCACCACAGACCAAGCAGCCTTGCCAGCCCCACCAAGTCCAGGAGCCCTGTGCC  
 CCCAAGTGCCACCCCTCAGCAGTGCAGACGTCCAAGCAGAAGTAAAGCCCTGGGCATGTGATCAGAGGCG  
 AACCCCCAGGAAAACAGAGCATGAAGTCTCTTCTGGGCCAGCATTTACTCCACAGGCAAGCAAAGCCC  
 TGCTACCAGTCTCTGGATGCAGCCACACTTACACTTGCAGGAGAGGAGCACCAGGCTGGCAGTGGCG  
 GCTTCTCGAGCTCTACTCTTAATTAGCAGTGCAGTTTCCATCTCAGACAAGGATCTGGTTCTAAACTATC  
 TAATCATTTTCTGACATGCATCTACATTGCCCTGTGGAAACATGAGCGGCATGCACAGGCATTTCTCTAC  
 CACGCTTCCCCTCAGCTCTGTTTTCAAACAATTAACAGAAATCCTCTGGCA 3'

B

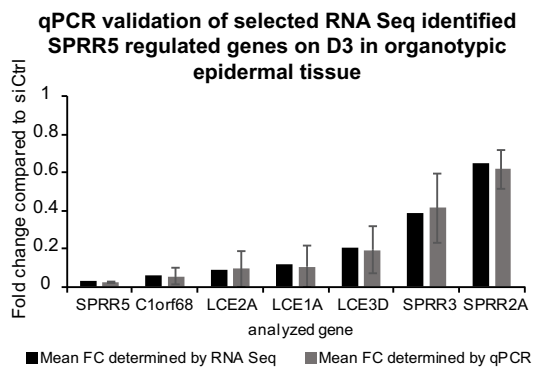

C

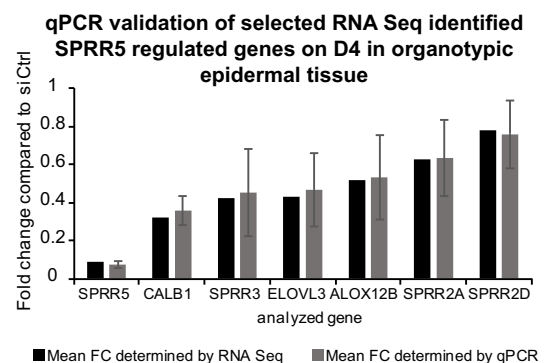

**Figure EV4. Sequence of the human SPRR5 transcript and validation of RNA-Seq results.**

- A The SPRR5 sequence as well as the exon (black)/intron (red) structure of the human SPRR5 transcript are shown.  
 B, C qRT-PCR validation of the obtained RNA-Seq results for selected genes on day 3 (D3; B) or day 4 (D4; C) in SPRR5-depleted organotypic epidermal tissue ( $n = 3-5$  epidermal tissue cultures/knockdown group). Data are presented as mean  $\pm$  SD.

**A** Co-depletion of LINC00941 and SPRR5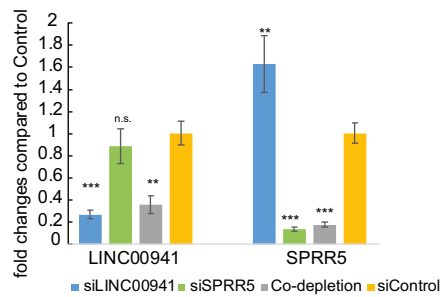**B** Levels of differentiation-markers in LINC00941/SPRR5 Co-depleted Keratinocytes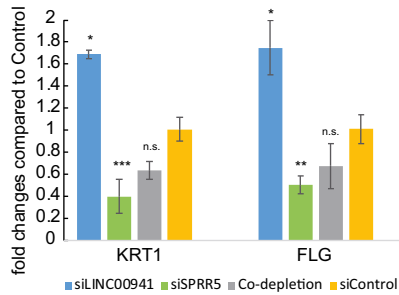**Figure EV5. Co-depletion of LINC00941 and SPRR5.**

A, B siPool-mediated LINC00941, SPRR5 knockdown, and co-depletion of LINC00941 and SPRR5 on day 3 (D3) of calcium-induced keratinocyte differentiation ( $n = 3$  biological replicates/knockdown group). Data are presented as mean  $\pm$  SD. Statistical significance was tested by an unpaired  $t$ -test and corrected for multiple testing after Bonferroni (\*adj.  $P$ -value < 0.05, \*\*adj.  $P$ -value < 0.01, \*\*\*adj.  $P$ -value < 0.001, and n.s. = not significant).
